# Supplementary material
Source: Research Square preprint supplement (doi:10.21203/rs.3.rs-9923850/v1)
Supplement: Supplementary file 1 [file 1346758c5c9ddc5612044aeb.pdf]

# Supplemental Figure S1

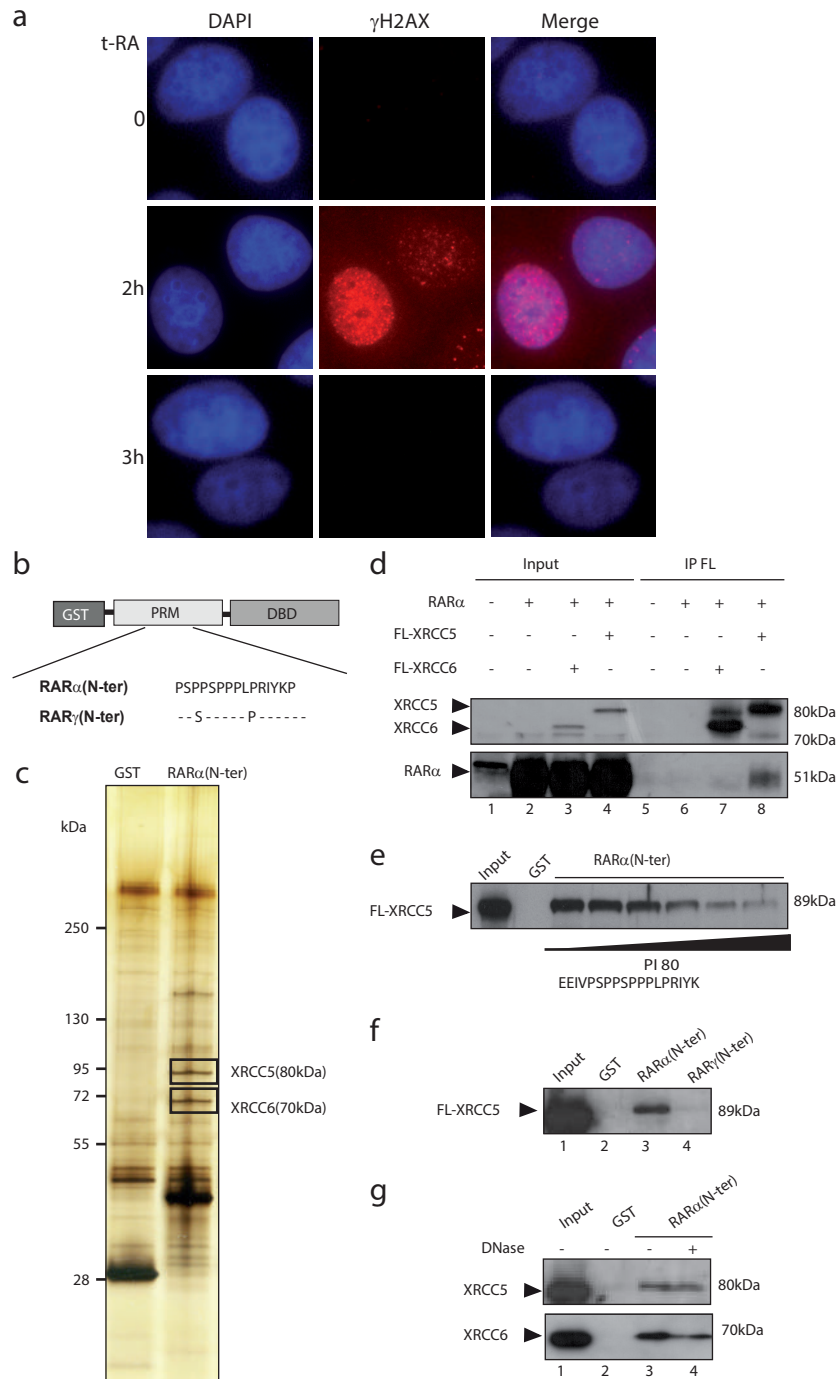

# Supplemental Figure S2

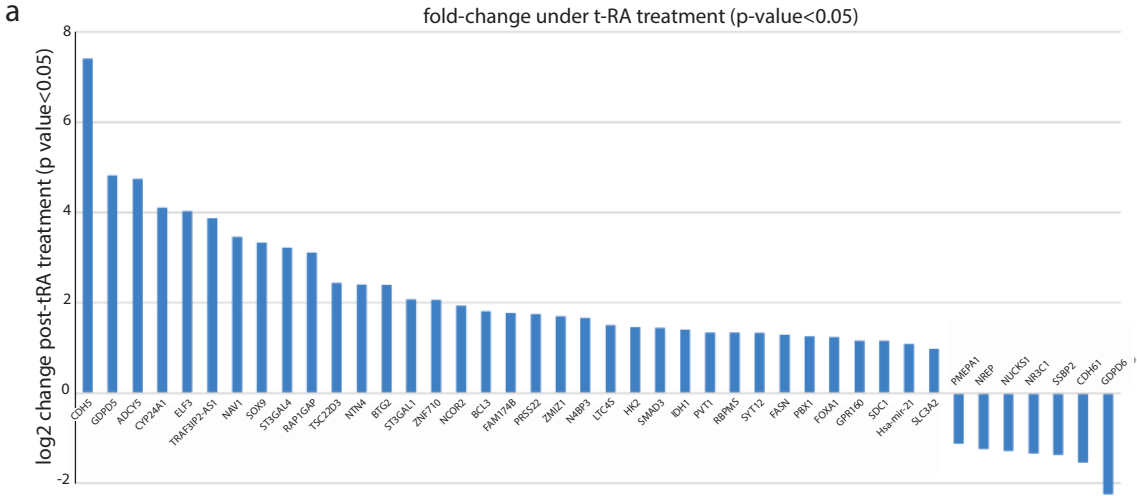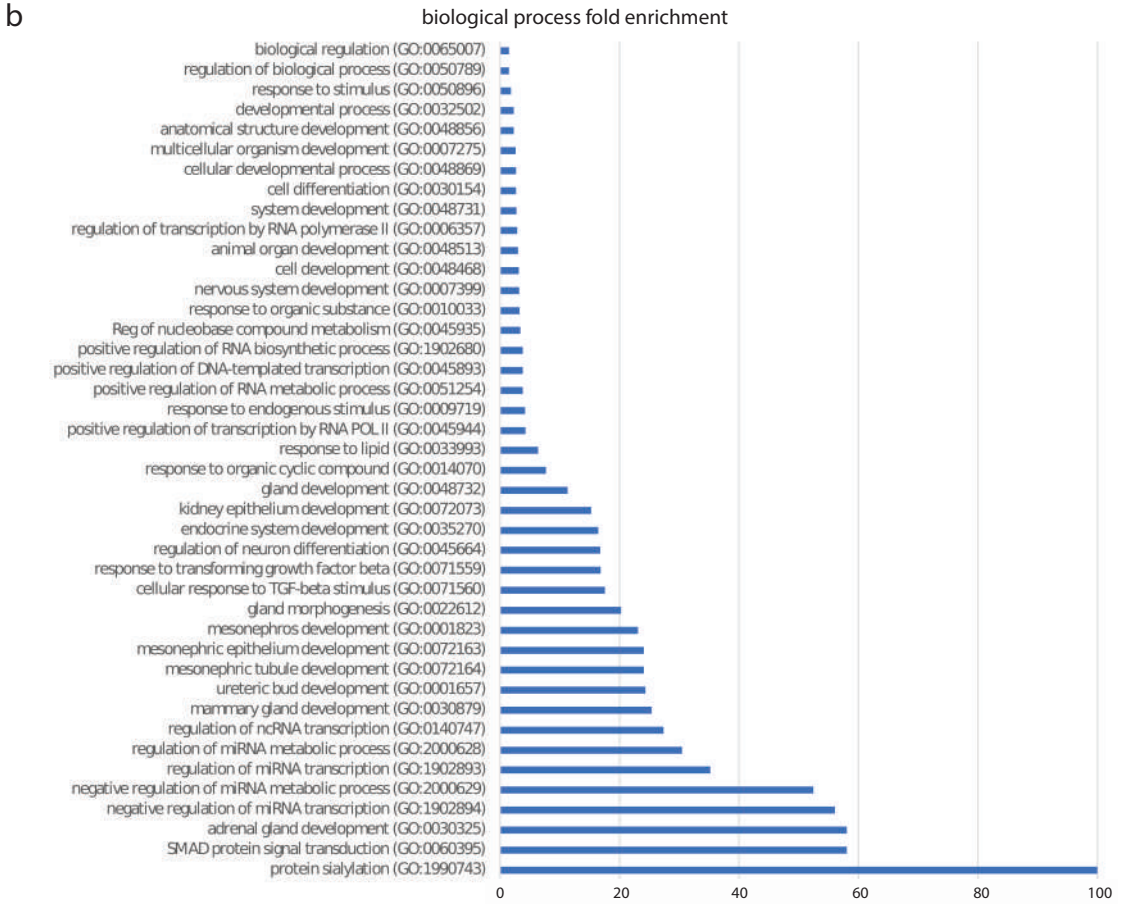

## Supplemental Figure S3

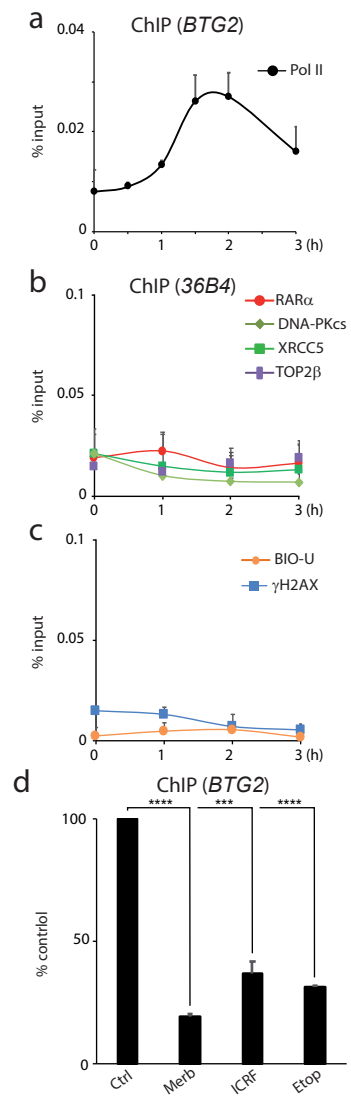

# Supplemental Figure S4

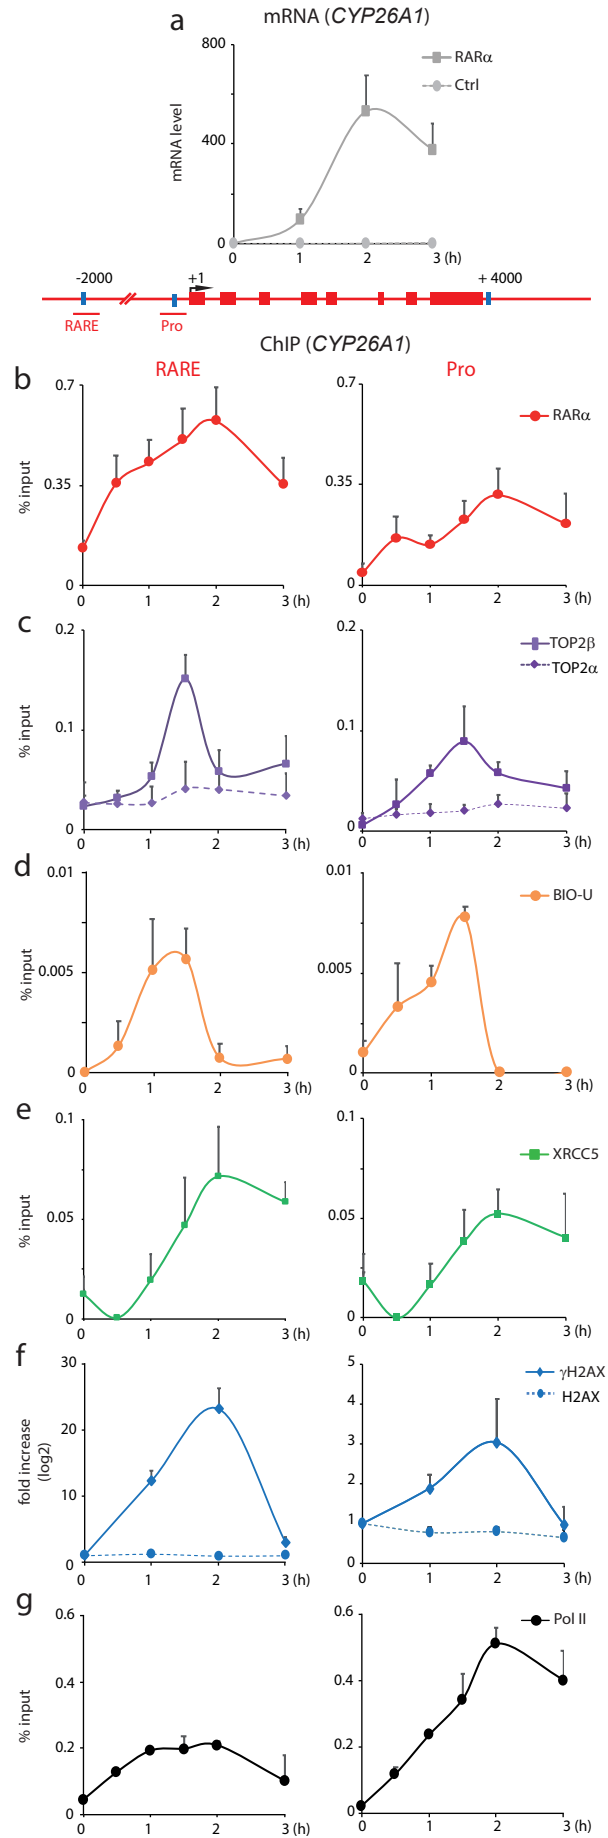

## Supplemental Figure S5

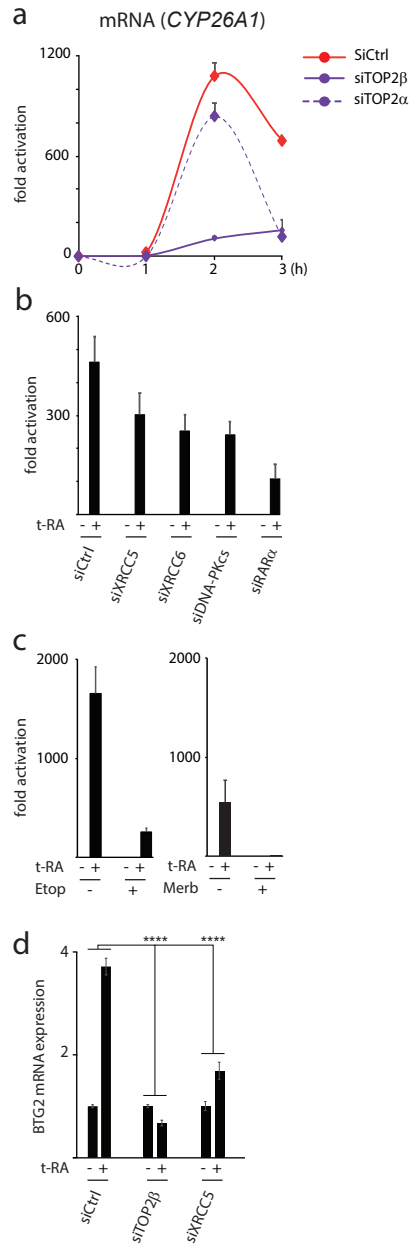

# Supplemental Figure S6

*BTG2* (MCF7 cells)

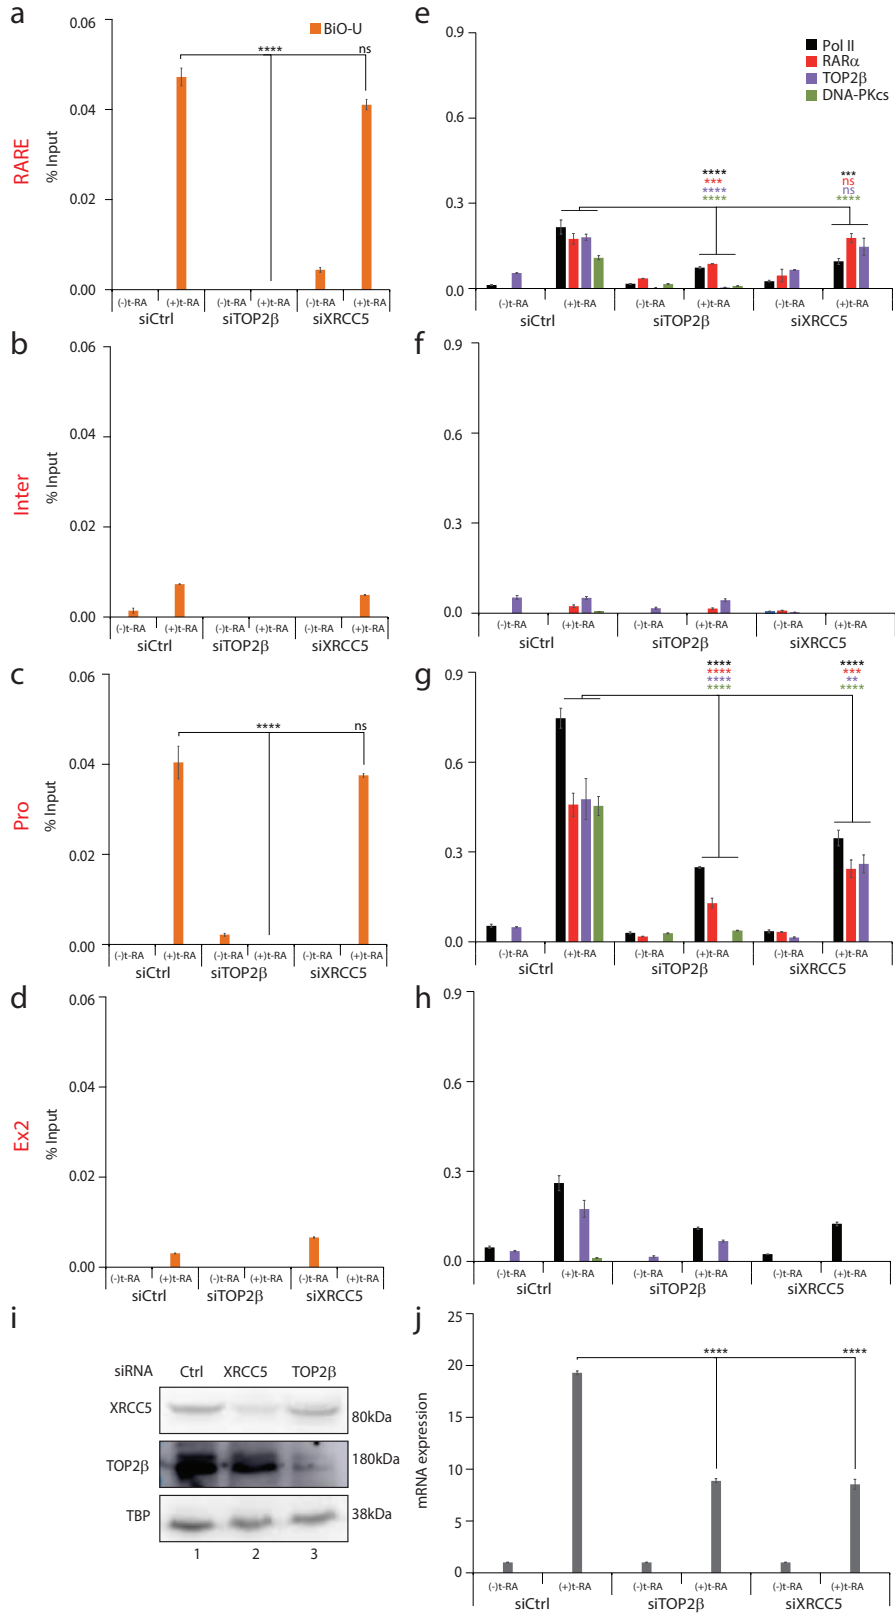

## Supplemental Figure S7

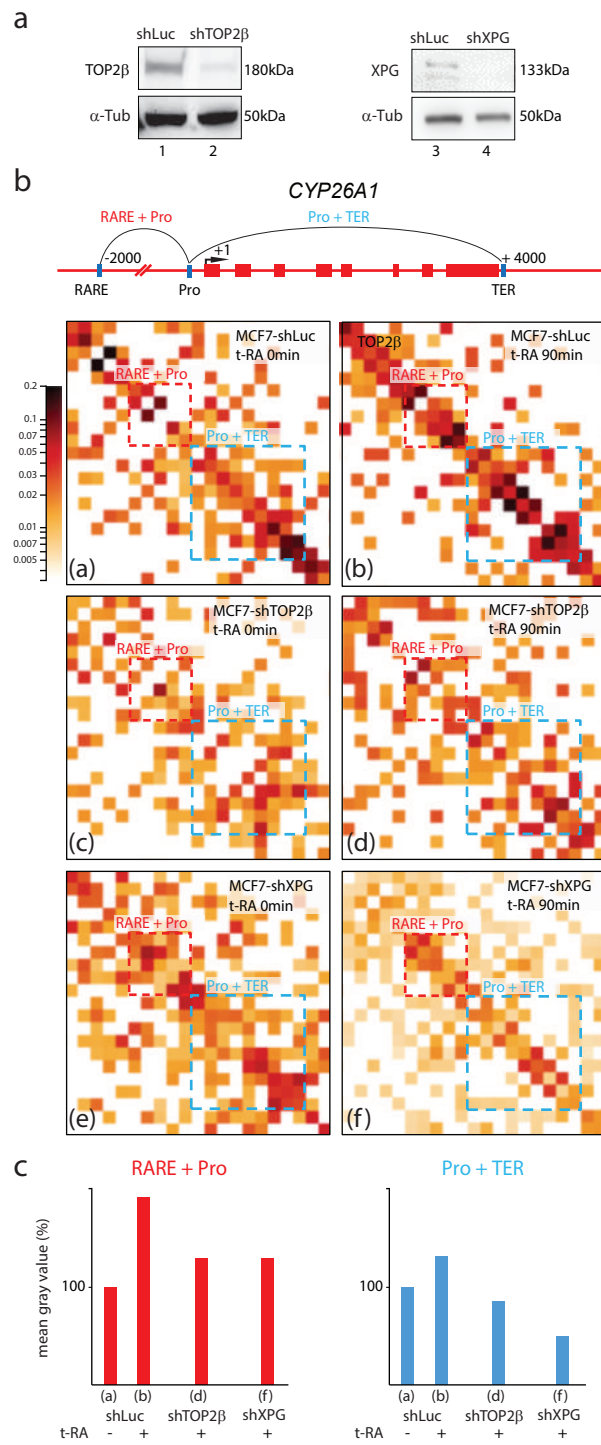

# Supplemental Figure S8

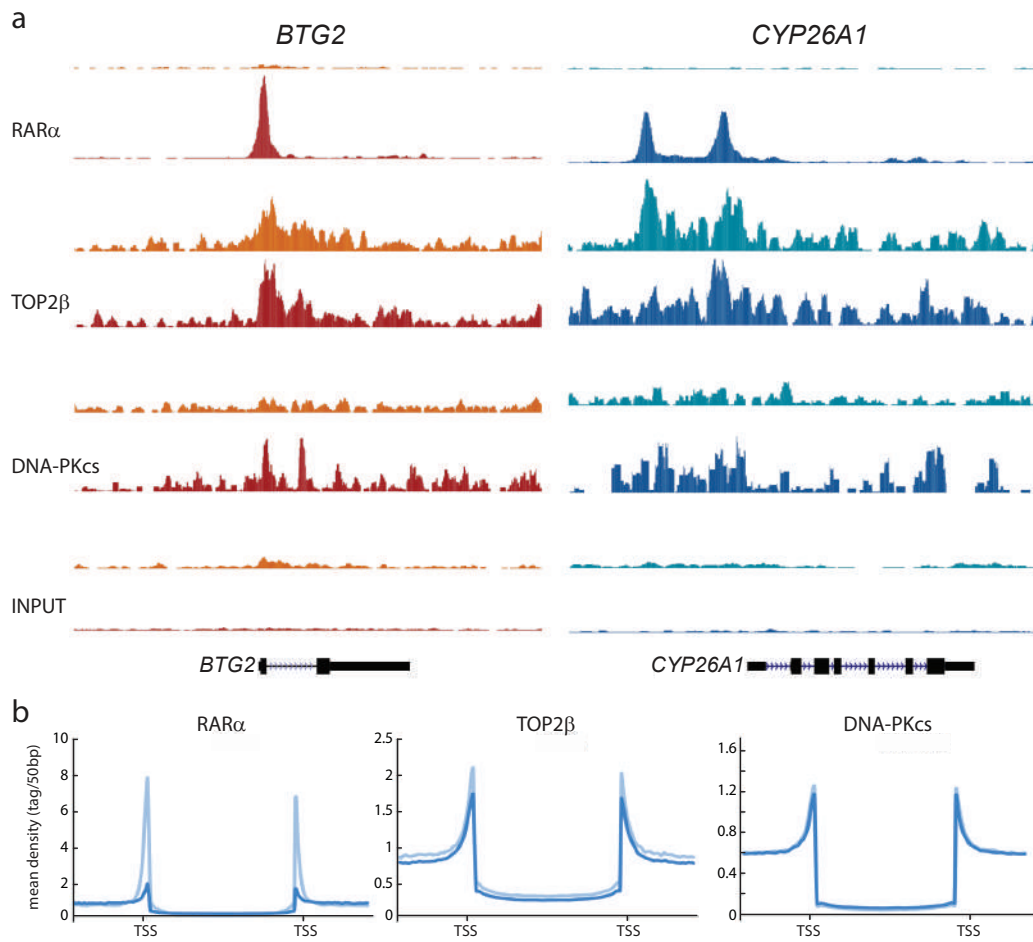

# Supplemental Figure S9

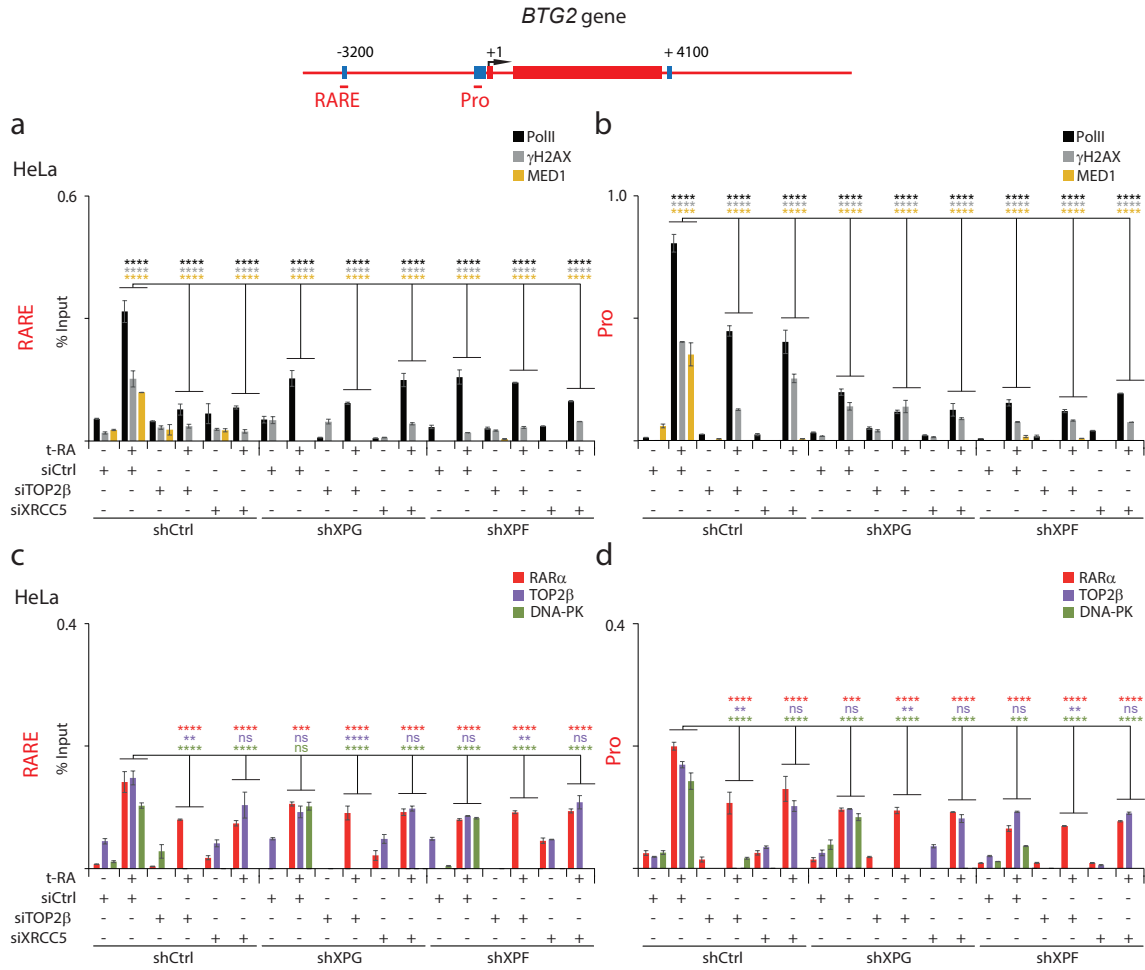

Supplemental Table S1

| Table S1a    |              | IP IgG Ctrl | IP RAR $\alpha$          |       |          |     |      |          |        |     |
|--------------|--------------|-------------|--------------------------|-------|----------|-----|------|----------|--------|-----|
| Accession    | Name         | Cover       | Score                    | Cover | Peptides | PSM | AAS  | MW (kDa) | PSM/aa | SAF |
| MCF7 cells   |              |             |                          |       |          |     |      |          |        |     |
| P78527       | DNA-PKcs     | 0,00        | 110,8                    | 9,81  | 28       | 30  | 4128 | 468,8    | 7,3    | 7   |
| Q02880       | Top2 $\beta$ | 0,00        | 83,36                    | 14,94 | 20       | 23  | 1626 | 183,2    | 14,1   | 14  |
| P10276       | RAR $\alpha$ | 0,00        | 53,98                    | 31,82 | 10       | 15  | 462  | 50,7     | 32,5   | 32  |
| P12956       | XRCC6        | 0,00        | 30,23                    | 17,73 | 7        | 8   | 609  | 69,8     | 13,1   | 11  |
| P12010       | XRCC5        | 0,00        | 32,35                    | 13,52 | 7        | 8   | 732  | 82,7     | 11     | 13  |
| Table S1b    |              | GST         | GST-RAR $\alpha$         |       |          |     |      |          |        |     |
| Accession    | Name         | Cover       | Score                    | Cover | Peptides | PSM | AAS  | MW (kDa) |        |     |
| MCF7cells    |              |             |                          |       |          |     |      |          |        |     |
| P13010       | XRCC5        | 0,00        | 32,72                    | 15,16 | 9        | 9   | 732  | 82,7     |        |     |
| P12956       | XRCC6        | 0,00        | 29,62                    | 16,42 | 7        | 7   | 609  | 69,8     |        |     |
| BT74cells    |              |             |                          |       |          |     |      |          |        |     |
| P13010       | XRCC5        | 0,00        | 37,96                    | 22,4  | 9        | 10  | 732  | 82,7     |        |     |
| P12956       | XRCC6        | 0,00        | 29,69                    | 15,44 | 7        | 7   | 609  | 69,8     |        |     |
| HeLacells    |              |             |                          |       |          |     |      |          |        |     |
| P13010       | XRCC5        | 0,00        | 9,07                     | 4,1   | 3        | 3   | 732  | 82,7     |        |     |
| P12956       | XRCC6        | 0,00        | 9,32                     | 4,11  | 2        | 2   | 609  | 69,8     |        |     |
| Table S1c    |              | GST         | GST-RAR $\alpha$ (N-ter) |       |          |     |      |          |        |     |
| Accession    | Name         | Cover       | Score                    | Cover | Peptides | PSM | AAS  | MW (kDa) |        |     |
| MCF7cells    |              |             |                          |       |          |     |      |          |        |     |
| P13010       | XRCC5        | 0,00        | 71,12                    | 16,39 | 9        | 15  | 732  | 82,7     |        |     |
| P12956       | XRCC6        | 0,00        | 74,61                    | 32,02 | 14       | 16  | 609  | 69,8     |        |     |
| SH-SY5Ycells |              |             |                          |       |          |     |      |          |        |     |
| P13010       | XRCC5        | 0,00        | 153,23                   | 34,43 | 17       | 30  | 732  | 82,7     |        |     |
| P12956       | XRCC6        | 0,00        | 155,12                   | 40,39 | 18       | 33  | 609  | 69,8     |        |     |
