# Supplementary material
Source: Research Square preprint supplement (doi:10.21203/rs.3.rs-9923850/v1)
Supplement: Supplementary file 2 [file ff1e19336ec10ce71a59cc33.docx]

**Supplemental Figure S1: (a)** RA induces the formation of transient γH2AX foci in the nuclei of MCF7 cells at the indicated times when stained for γH2AX foci (red) and DAPI (blue). At 2 h after 10-7 M t-RA addition, 31% of the cells were positive; no signal was observed in absence of t-RA nor after 3h past t-RA treatment. **(b)** Schematic representation of the RARα(N-ter) and RARγ(N-ter) GST baits and the corresponding sequences; **(c)** SDS-PAGE and silver staining of the RARα partners purified from MCF7 cells extracts with the RARα(N-ter) GST bait; (**d**) Immuno-precipitation of RARα from transfected MCF7 cells extracts using XRCC5- and XRCC6-Flag antibodies; **(e)** Disruption of the interaction of Flag-XRCC5 with GST-RARα(N-ter) by the peptide PI 80 corresponding to the PRM of RARα; (**f**) Specificity of the interaction of XRCC5 with RARα(N-ter) but not with RARγ(N-ter), from COS 7 cells extracts overexpressing Flag-XRCC5. **(g)** Interaction of XRCC5 and XRCC6 with GST-RARα(N-ter), was not modified upon DNAse I treatment.

**Supplemental Figure S2: (a)** Identification of the up and down regulated genes upon t-RA induction of MCF7 cells by RNAseq. The name of the genes is indicated below. **(b)** GO (molecular function) analysis of the genes underwent significant up and down regulation upon t-RA induction. The histogram shows the top deregulated biological pathways according to FDR and fold enrichment.

**Supplemental Figure S3: (a)** Kinetic ChIP- qPCR experiments monitoring the presence of Pol II at the promoter of BTG2 genes in t-RA treated cells (related to figure 2). Kinetic ChIP qPCR on t-RA treated MCF7 cells to evaluate the recruitment of the RARα, DNA-PKcs, XRCC5 and TOP2β **(b)** as well as the formation of DNA breaks (BIO-U) and γH2AX **(c)** at the 36B4 gene, a t-RA independant gene lacking RARE used as control. **(d)** Expression of the *BTG2* gene*,* as monitored by RT-qPCR in t-RA-treated MCF7 cells treated by either Merbarone (Merb), ICRF193 (ICRF) or etoposide (Etop).

**Supplemental Figure S4: Recruitment of TOP2β partners at RARE and promoter (Pro) of *CYP26A1:* (a)** Kinetics of the t-RA-induced expression of *CYP26A1* in MCF7 cells*,* as monitored by RT-qPCR. Kinetic ChIP-qPCR experiments performed in t-RA-treated MCF7 cells extract, monitoring the recruitment of **(b)** RARα, **(c)** TOP2β/TOP2α, **(e)** XRCC5 **(f)** unphosphorylated H2AX and γH2AX and (g) Pol II at RARE and Pro of *CYP26A1*. Bio-ChIP after incorporation of biotinylated dUTP (BIO-U) shows the presence of DNA breaks in the surroundings of the RARE and Proupon RA induction**(d)**. In all panels, data points show mean of triplicates from at least two individual experiments.

**Supplemental Figure S5:**

**(a)** BTG2 induction by t-RA in siCtrl, siTOP2β and siXRCC5 HeLa cells (P<0.0001,****), RT-qPCR experiments monitoring the expression of *CYP26A1* in t-RA treated MCF7 cells either silenced for TOP2β TOP2α **(b)** or for XRCC5, XRCC6, DNA-PKcs subunits ofDNA-PK; and RARα **(c)**, or following Etoposide or Merbarone treatment **(d)**. In all panels, data points show mean of triplicates from at least two individual experiments.

**Supplemental Figure S6:** Bio-ChIP after incorporation of biotinylated dUTP (BIO-U) showing the presence of DNA breaks at RARE **(a)**, Inter **(b)**, Pro **(c)** and Ex2 **(d)** of *BTG2* in t-RA-treated siCtrl, siTOP2β and siXRCC5 MCF7 cells**.** ChIP-qPCR experiments monitoring the presence of Pol II, RARα, TOP2β and DNA PKcs at RARE **(e)**, Inter **(f)**, Pro **(g)** and Ex2 **(h)** regions of *BTG2* in t-RA-treated siCtrl, siTOP2β and siXRCC5 MCF7 cells. Western blot analyses of TOP2β and XRCC5 performed on siCtrl, siTOP2β and siXRCC5 whole MCF7 cell extracts **(i)**. RT-qPCR experiments monitoring the expression of *BTG2* in t-RA treated MCF7 cells **(J)**. In all panels, data points show mean ±SEM of triplicates from three individual experiments. *p<0,05, **p<0,01, ***p<0,001, ****p<0,0001, (ns) not significant.

**Supplemental Figure S7: Genome structure analysis of CYP26A1 locus by Micro-C:**

**(a)** Western blot analyses of TOP2β and XPG were performed from stable shTOP2β and shXPG MCF7 cell lines extracts. **(b**) Schematic representation of CYP26A1 gene. The CYP26A1 locus DNA interactions of stable shLuc (*panels a-b*), shTOP2β *(panels c-d*) and shXPG (*panels e-f*) MCF7 cells were shown as contact matrix. The interaction of RARE/Pro and Pro/TER before (t= 0min) and after t-RA treatment (t=90min) were labelled by red and blue dashed squares. Histograms were generated by scanning the image within blue and red squares with ImageJ software and the MCF7-shLuc (*panel a*) was set as control for calculating the relative interaction value **(c)**.

**Supplemental Figure S8:** (a) UCSC genome browser for RARa, TOP2β and DNA-PKcs at BTG2 and CYP26A1 promoters at t=0 (light orange and blue) and t=90 min (dark orange and blue) after 10-7 M t-RA treatment of MCF7 cells. The structures of the genes are indicated at the bottom of each panel at the same scale. (b) Metagene profiles of RARa, TOP2β and DNA-PKcs along the 1084 genes regulated by RARa nuclear receptors at t=0 (dark blue) and t=90 min (light blue) after 10-7 M t-RA treatment of MCF7 cells.

**Supplemental Figure S9:** ChIP-qPCR experiments performed on RA-treated shCtrl, shXPG and shXPF HeLa cells after siTOP2β or siXRCC5 silencing, monitoring the recruitment of Pol II, MED1 and γH2AX **(a-b)** as well as RARα, TOP2β and DNA-PK **(c-d)** at both RARE and Pro of *BTG2*. Each series of ChIPs is representative of at least two independent experiments.

**Table S1: (a)** Identification by Nano LC-LTQ-Orbitrap MS of the DNA damage and repair machineries in the complexes associated with RARα after immunoprecipitation of MCF7 cells extracts. SAF normalize the number of amino-acids. **(b)** Identification by nano LC-MS/MS analysis of the XRCC5 and XRCC6 proteins in the 90 and 75 kDa bands obtained after SDS-PAGE and pull-down experiments performed with GST-RARα (aa 69-168) and extracts from MCF7, BT474 and HeLa cells. **(c)** Identification by NanoLC-MS/MS analysis (Orbitrap technology) of the XRCC5 and XRCC6 proteins directly in the eluates obtained after GST- RARα (aa 69-168) pull down of MCF7 and SH-SY5Y cell extracts.
